# Supplementary material for: WNT1 Inducible Signaling Pathway Protein 1 Is a Stroma-Specific Secreting Protein Inducing a Fibroblast Contraction and Carcinoma Cell Growth in the Human Prostate
Source: MDPI journal article supplement (doi:10.3390/ijms231911437), 2022-09-28
Supplement: s1 [file s1]

**A**

gtaagatgtgcgctcagcagcttggggacaactgcacggaggctgccatctgtgacccccac  
K M C A Q Q L G D N C T E A A I C D P H  
cggggcctctactgtgactacagcggggaccgcccagggtacgcaataggagtgtgtgca  
R G L Y C D Y S G D R P R Y A I G V C A  
cagggtggtcgggtgtgggctgcgtcctggatggggtgcgctacaacaacggccagtccttc  
Q V V G V G C V L D G V R Y N N G Q S F  
cagcctaactgcaagtacaactgcacgtgcatcgacggcgcggtgggctgcacaccactg  
Q P N C K Y N C T C I D G A V G C T P L  
tgctccgagtgcgccccccgctctgtggtgccccaccgcggcgctgagcatacct  
C L R V R P P R L W C P H P R R V S I P  
ggccactgctgtgagcagtgggtatgtgaggacgacgccaagaggccacgcaagaccgca  
G H C C E Q W V C E D D A K R P R K T A  
ccccgtgacacaggagccttcgatgctgtgggtgaggtggaggcatggcacaggaactgc  
P R D T G A F D A V G E V E A W H R N C  
atagcctacacaagcccctggagccctgtctccaccagctgcggcctgggggtctccact  
I A Y T S P W S P C S T S C G L G V S T  
cggatctccaatgttaacgcccag  
R I S N V N A Q

**B**

gtaagatgtgcgctcagcagcttggggacaactgcacggaggctgccatctgtgacccccac  
K M C A Q Q L G D N C T E A A I C D P H  
cggggcctctactgtgactacagcggggaccgcccagggtacgcaataggagtgtgtgca  
R G L Y C D Y S G D R P R Y A I G V C A  
catgctgtgggtgaggtggaggcatggcacaggaactgcatagcctacacaagcccctgg  
H A V G E V E A W H R N C I A Y T S P W  
agccctgtctccaccagctgcggcctgggggtctccactcggatctccaatgttaacgcc  
S P C S T S C G L G V S T R I S N V N A  
cag  
Q

supplement Figure S1. The sequences and predicative translational proteins of the WISP1v1 (A) and WISP1v2 (B) cDNA fragments synthesize from RT-PCR.
